# Supplementary material
Source: publisher site journal article supplement (https://www.dovepress.com/article/564992)
Supplement: Supplementary file 1 [file 564992%20Supplementary%20Material.docx]

**Supplementary Table 1** Summary of Primary and Secondary Outcomes for Active and Sham tDCS Groups

|  | Time | Sham-G | Active-G | MD | 95% CI | Cohen´s d |
| --- | --- | --- | --- | --- | --- | --- |
| VAS | T0 | 52.2±20.3 | 49.7±19.5 | - | - | - |
| T1 | 29.7±28.2 | 30.0±26.4 | 0.30 | -18.9;19.5 | 0.01 |
| T2 | 39.4±31.1 | 23.4±29.3 | -16.0 | -37.2;5.2 | -0.53 |
| TUG | T0 | 7.78±1.91 | 7.52±1.69 | - | - | - |
| T1 | 7.77±1.29 | 7.56±1.70 | -0.21 | -1.26;0.84 | -0.14 |
| T2 | 7.40±1.31 | 7.56±1.59 | 0.16 | -0.85;1.17 | 0.11 |
| 6MWT | T0 | 492.0±87.8 | 495.0±96.3 | - | - | - |
| T1 | 510.0±84.7 | 548.0±72.6 | 38.00 | -17.5;93.5 | 0.48 |
| T2 | 484.0±69.0 | 486.0±87.1 | 2.00 | -52.7;56.7 | 0.03 |
| Chair Stand Test | T0 | 16.3±5.29 | 17.2±5.09 | - | - | - |
| T1 | 16.1±6.81 | 17.8±5.91 | 1.70 | -2.75;6.19 | 0.27 |
| T2 | 15.9±4.02 | 17.9±6.80 | 2.00 | -1.85;5.85 | 0.35 |
| Hamilton Scale | T0 | 18.8±8.16 | 20.2±9.14 | - | - | - |
| T1 | 16.4±9.31 | 15.8±8.44 | -0.6 | -6.84;5.64 | -0.07 |
| T2 | 15.8±10.5 | 18.1±9.36 | 2.3 | -4.69;9.29 | 0.23 |
| BDI | T0 | 11.0±7.50 | 11.4±7.52 | - | - | - |
| T1 | 9.06±7.65 | 10.8±6.96 | 1.74 | -3.40;6.88 | 0.24 |
| T2 | 9.25±9.48 | 10.9±7.87 | 1.65 | -4.49;7.79 | 0.19 |
| Affect Positive | T0 | 13.2±6.37 | 16.7±5.78 | - | - | - |
| T1 | 14.6±6.33 | 16.3±6.88 | 1.7 | -2.93;6.33 | 0.26 |
| T2 | 14.4±4.80 | 17.5±5.96 | 3.1 | -0.67;6.87 | 0.57 |
| Affect Negative | T0 | 11.2±5.92 | 12.6±9.35 | - | - | - |
| T1 | 9.44±7.38 | 9.11±6.25 | -0.33 | -5.14;4.48 | -0.05 |
| T2 | 9.31±6.96 | 9.44±7.02 | 0.13 | -4.77;5.03 | 0.02 |
| WHOQOL  Physical Domain | T0 | 2.22±0.41 | 2.34±0.59 | - | - | - |
| T1 | 2.30±0.40 | 2.44±0.38 | 0.14 | -0.13;0.41 | 0.36 |
| T2 | 2.24±0.32 | 2.37±0.31 | 0.13 | -0.09;0.35 | 0.41 |
| WHOQOL  Psychology Domain | T0 | 2.27±0.44 | 2.53±0.53 | - | - | - |
| T1 | 2.15±0.38 | 2.52±0.46 | 0.37 | 0.08;0.66 | 0.87 |
| T2 | 2.16±0.41 | 2.47±0.30 | 0.31 | 0.06-0.56 | 0.87 |
| WHOQOL  Social Relation Domain | T0 | 2.86±0.81 | 3.01±0.77 | - | - | - |
| T1 | 2.75±0.51 | 2.96±0.87 | 0.21 | -0.28;0.70 | 0.29 |
| T2 | 2.62±0.72 | 2.77±0.68 | 0.15 | -0.34;0.64 | 0.21 |
| WHOQOL  Environment Domain | T0 | 2.23±0.55 | 2.55±0.64 | - | - | - |
| T1 | 2.36±0.67 | 2.64±0.56 | 0.28 | -0.15;0.71 | 0.46 |
| T2 | 2.42±0.70 | 2.66±0.40 | 0.24 | -0.17;0.65 | 0.43 |

**Note:** T0: baseline assessment (day 1 of second cycle). T1: post-intervention assessment (first day of third cycle). T2 = follow-up (one cycle after T1). Data are presented as mean and standard deviation (SD).

**Abbreviations:** MD: Mean Difference (active minus sham). CI: Confidence Interval. VAS: Visual Analogue Scale. TUG: Timed Up and Go test. 6MWT: Six-Minute Walk Test. HAS: Hamilton Anxiety Scale. BDI: Beck Depression Inventory. WHOQOL: World Health Organization Quality of Life.

**Supplementary Table 2** Results from the comparison between group, time, and group-by-time interaction.

|  | Effect | F value | MSE | η2 | p-value |
| --- | --- | --- | --- | --- | --- |
| VAS | Group | 1.07 | 869.60 | 0.01 | 0.31 |
| Time | 7.93 | 640.98 | 0.12 | <0.01* |
| Group x Time | 1.09 | 640.98 | 0.02 | 0.34 |
| TUG | Group | 0.06 | 5.11 | 0.001 | 0.81 |
| Time | 0.28 | 1.53 | 0.002 | 0.72 |
| Group x Time | 0.35 | 1.53 | 0.004 | 0.67 |
| 6MWT | Group | 0.41 | 12523.1 | 0.007 | 0.52 |
| Time | 1.88 | 4462.7 | 0.05 | 0.02* |
| Group x Time | 1.88 | 4462.7 | 0.01 | 0.44 |
| Chair Stand Test | Group | 0.73 | 81.28 | 0.02 | 0.40 |
| Time | 0.04 | 9.89 | 0.0002 | 0.95 |
| Group x Time | 0.29 | 9.89 | 0.002 | 0.73 |
| Hamilton Scale | Group | 0.15 | 198.32 | 0.004 | 0.70 |
| Time | 3.89 | 27.47 | 0.03 | 0.03* |
| Group x Time | 0.74 | 27.47 | 0.005 | 0.48 |
| BDI | Group | 0.29 | 145.65 | 0.007 | 0.60 |
| Time | 0.81 | 26.53 | 0.005 | 0.42 |
| Group x Time | 0.26 | 26.53 | 0.001 | 0.70 |
| Affect Positive | Group | 2.33 | 82.61 | 0.051 | 0.13 |
| Time | 0.66 | 14.10 | 0.005 | 0.51 |
| Group x Time | 0.51 | 14.10 | 0.004 | 0.59 |
| Affect Negative | Group | 0.03 | 127.18 | 0.0008 | 0.86 |
| Time | 4.84 | 15.85 | 0.028 | 0.01* |
| Group x Time | 0.45 | 15.85 | 0.003 | 0.63 |
| WHOQOL  Physical Domain | Group | 1.27 | 0.33 | 0.03 | 0.27 |
| Time | 0.85 | 0.12 | 0.009 | 0.40 |
| Group x Time | 0.01 | 0.12 | 0.0001 | 0.96 |
| WHOQOL  Psychology Domain | Group | 5.99 | 0.41 | 0.12 | 0.02* |
| Time | 0.97 | 0.75 | 0.008 | 0.38 |
| Group x Time | 0.33 | 0.75 | 0.003 | 0.70 |
| WHOQOL  Social Relation Domain | Group | 0.63 | 1.13 | 0.01 | 0.43 |
| Time | 2.00 | 0.28 | 0.02 | 0.15 |
| Group x Time | 0.02 | 0.28 | 0.0002 | 0.97 |
| WHOQOL  Environment Domain | Group | 2.50 | 0.79 | 0.06 | 0.12 |
| Time | 1.65 | 0.15 | 0.01 | 0.20 |
| Group x Time | 0.09 | 0.15 | 0.0007 | 0.89 |

**Notes:** *Significant in repeated measures ANOVA at p < 0.05.

**Abbreviations:** MSE: Mean Squared Error. VAS: Visual Analogue Scale. TUG: Timed Up and Go test. 6MWT: Six-Minute Walk Test. HAS: Hamilton Anxiety Scale. BDI: Beck Depression Inventory. WHOQOL: World Health Organization Quality of Life.
